# Supplementary material for: Blood Plasma Metabolome Profiling at Different Stages of Renal Cell Carcinoma
Source: MDPI journal article supplement (doi:10.3390/cancers15010140), 2022-12-26
Supplement: s1 [file s1]

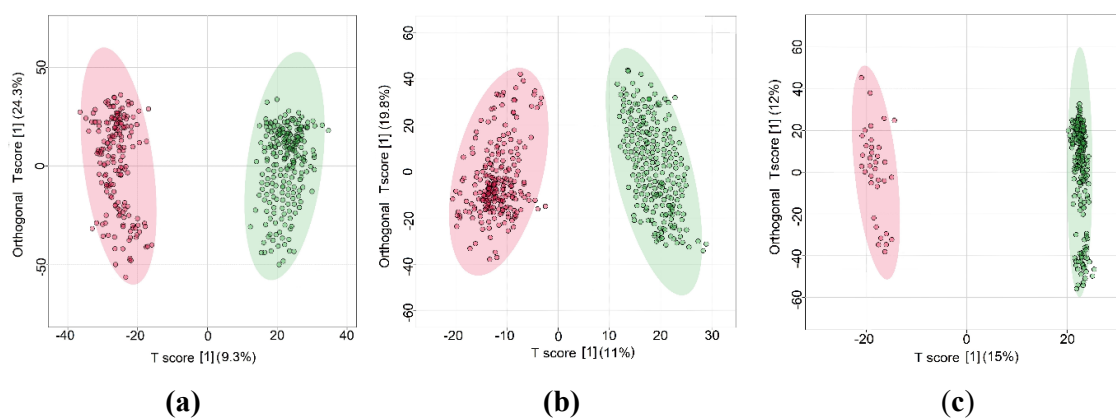

**Figure S1.** OPLS-DA score plots of metabolic profiles of blood plasma samples involved in the study. Plots demonstrate the distribution of ccRCC patient's samples (●) and samples of non-cancer volunteers (controls) (●). (a) – control vs ccRCC patients (III-IV stages); (b) – control vs ccRCC patients (I-II stages); (c) – control vs pRCC and chrRCC patients (I-II stages). The detailed model validation parameters ( $R^2$  and  $Q^2$ ) for each statistical analysis are summarized in Table S1.

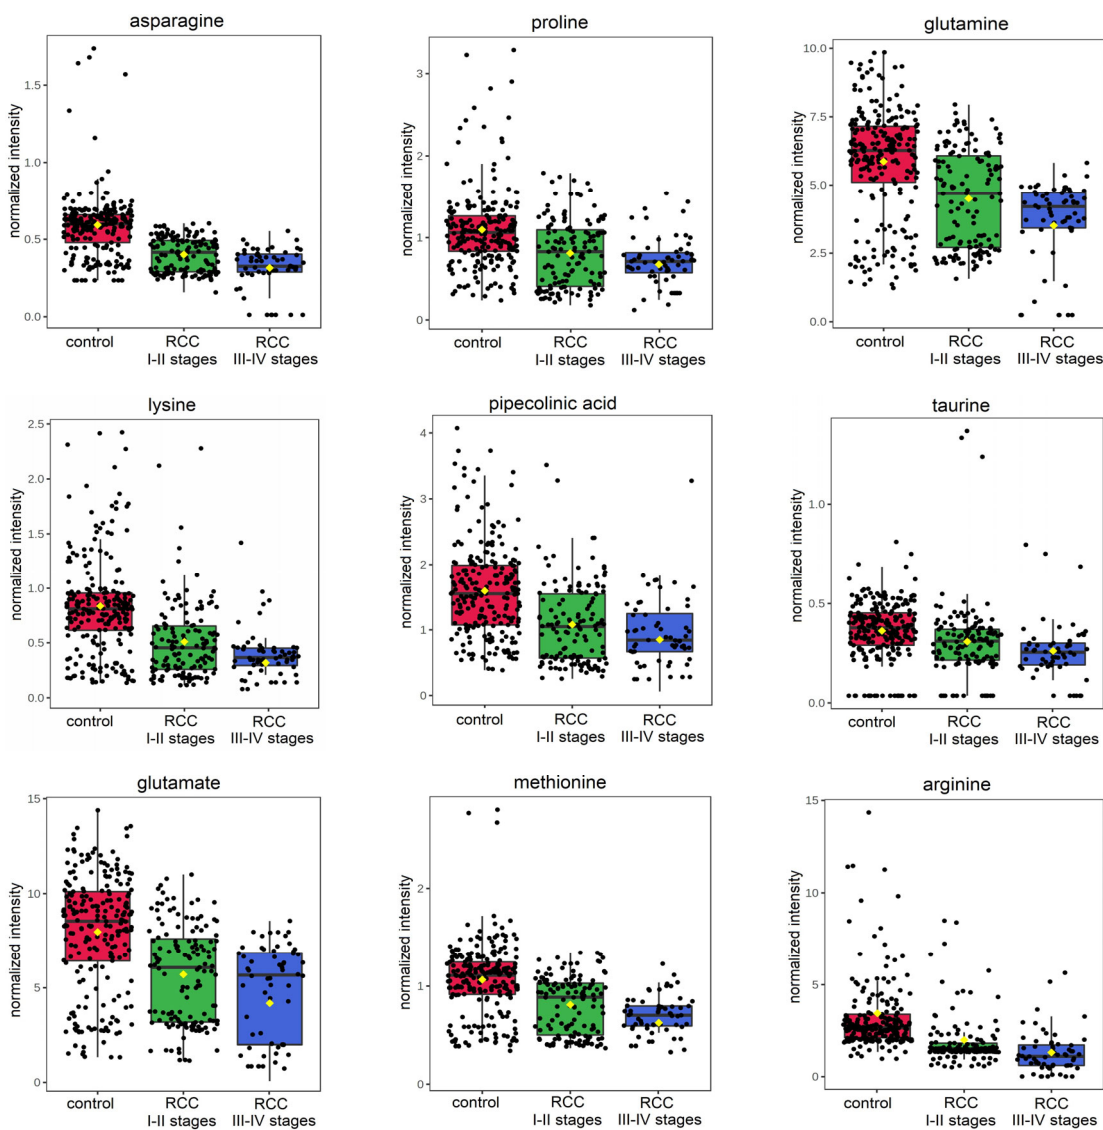

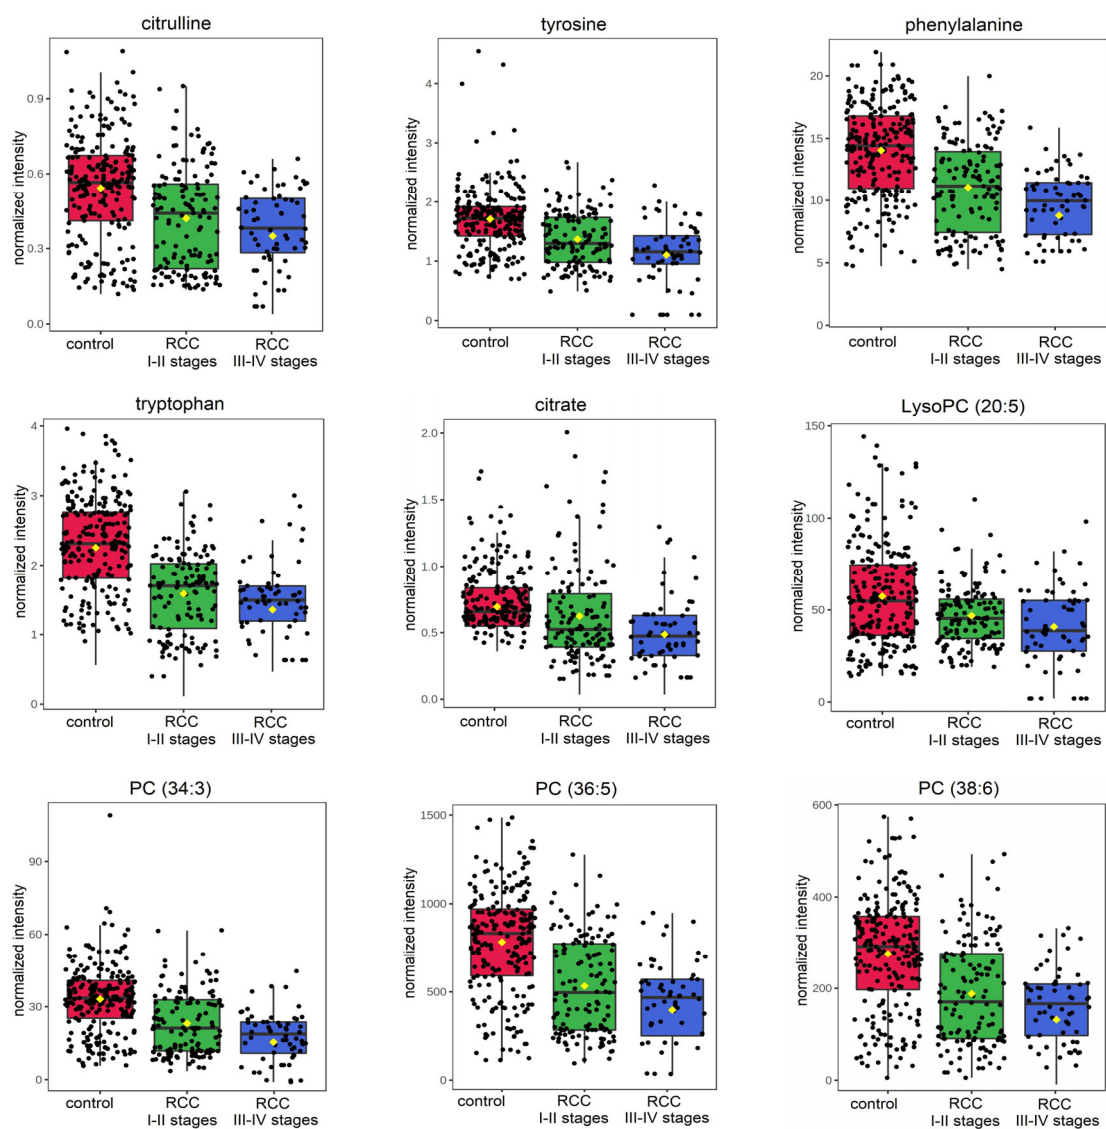

**Figure S2.** Box and whisker plots of the annotated metabolites between the controls and RCC patients at different stages. The box and whisker plot presents the distribution of normalized intensity values of the annotated metabolites. The top and bottom of the boxes represent the 25% and 75% percentiles; the 5% and 95% percentiles are indicated as error bars. The median value is indicated by horizontal lines within each box.

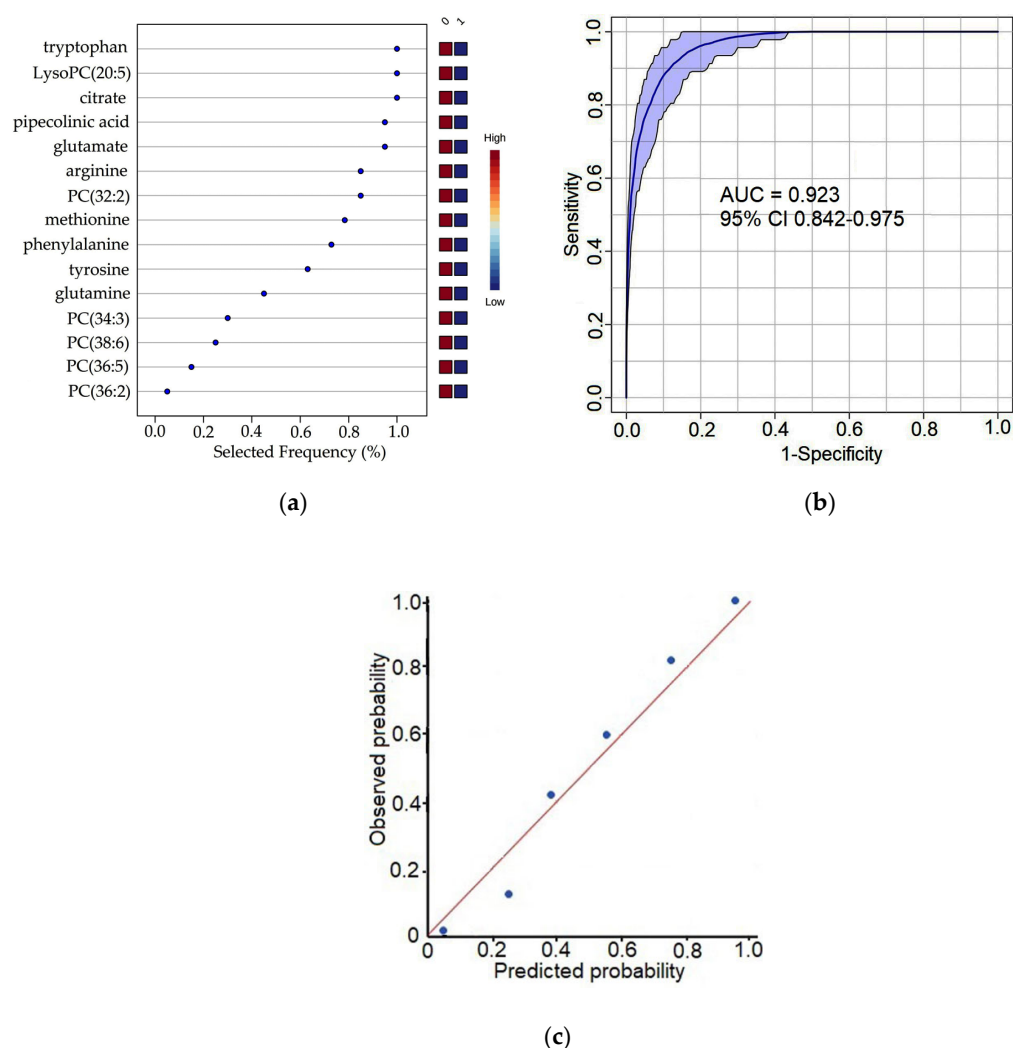

**Figure S3.** The selection of metabolites for the diagnostic model and its performance evaluation. **(a)** The top frequency metabolites. Random Forest algorithm was used for frequency ranking of the selected metabolites. The colored boxes on the right indicate the intensity of the corresponding metabolite in the groups (0 - control, 1- ccRCC patients). **(b)** The ROC curve of the most optimal diagnostic model (gives the largest AUC and the highest predictive accuracy) that was generated using 10 metabolites. The following mean values were obtained: AUC – 0.92 (95% CI: 0.84-0.98); sensitivity – 0.84 (95% CI: 0.77-0.89); specificity – 0.91 (95% CI: 0.83-0.96). The ROC curve was generated using the results of Monte-Carlo cross validation (MetaboAnalyst 5.0). 95% CI is shown in blue. **(c)** The overfitting-corrected calibration plot. Predicted probability vs. observed probability is shown.

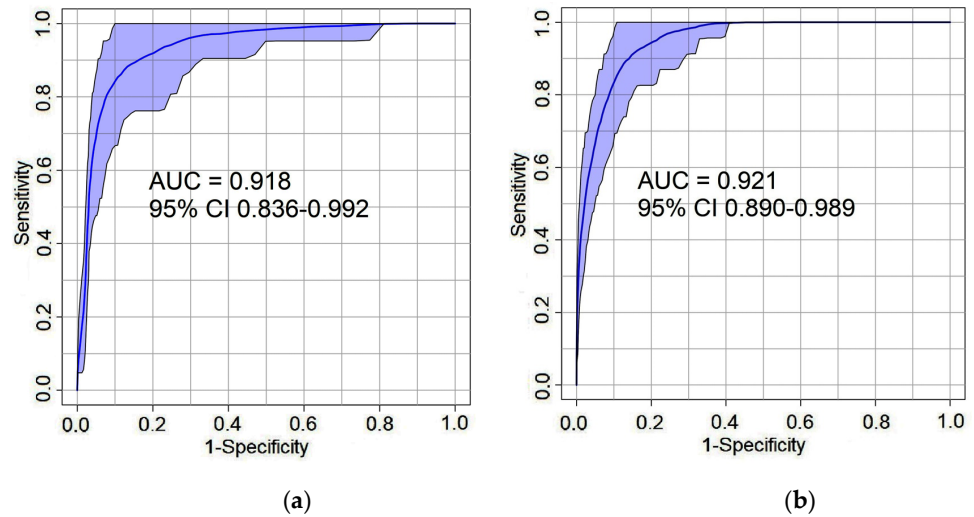

**Figure S4.** The ability of the diagnostic model (generated using 10 metabolites) to discriminate the patients with early stage ccRCC according to their gender. (a) The ROC curve was generated using samples of males with early stage ccRCC. The following mean values were obtained: AUC – 0.92 (95% CI: 0.84-0.98); sensitivity – 0.89 (95% CI: 0.81-0.95); specificity – 0.91 (95% CI: 0.80-0.96). (b) The ROC curve was generated using samples of females with early stage ccRCC. The following mean values were obtained: AUC – 0.92 (95% CI: 0.89-0.99); sensitivity – 0.86 (95% CI: 0.79-0.92); specificity – 0.97 (95% CI: 0.90-0.99). The ROC curves were generated using the results of Monte-Carlo cross validation (MetaboAnalyst 5.0). 95% CI are shown in blue.

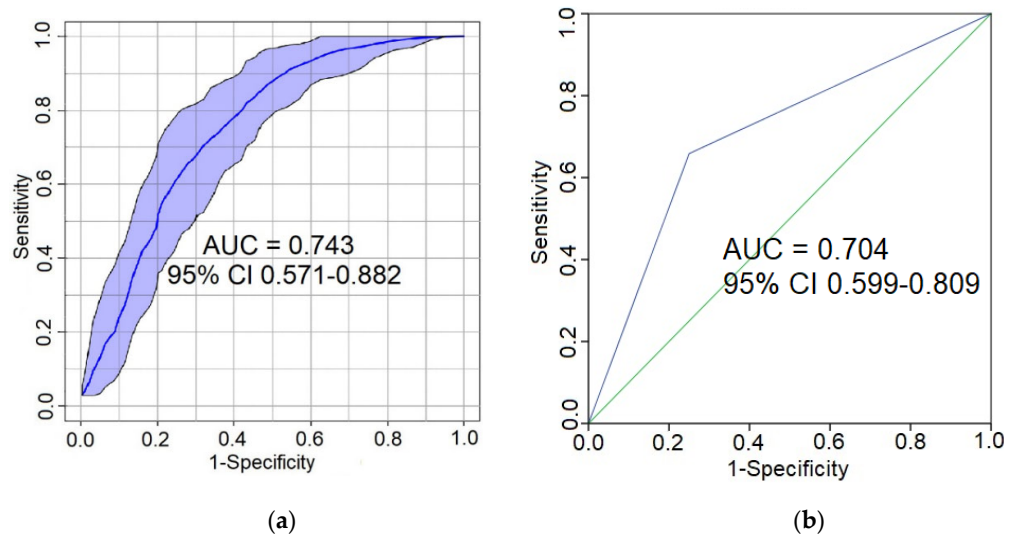

**Figure S5.** Receiver operating characteristic (ROC) curve showing the ability of the diagnostic model (generated using 10 metabolites) to distinguish the early stage ccRCC samples from advanced stage ccRCC samples. (a) The ROC curve was generated using the results of Monte-Carlo cross validation (MetaboAnalyst 5.0). The following mean values were obtained: AUC – 0.74 (95% CI: 0.57-0.88); sensitivity – 0.82 (95% CI: 0.75-0.89); specificity – 0.83 (95% CI: 0.73-0.92). 95% CI is shown in blue. (b) ROC curve of the diagnostic model obtained on the independent test set. The following values were obtained: AUC–0.70 (95% CI: 0.60-0.81), specificity–0.82 (95% CI: 0.75-0.88), and respectively–0.74 (95% CI: 0.62-0.83). SPSS was used to build the plot.

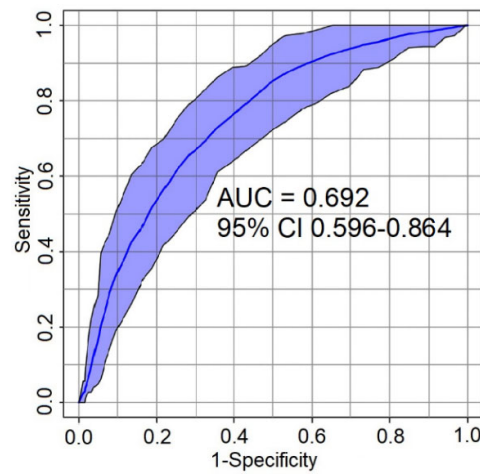

(a)

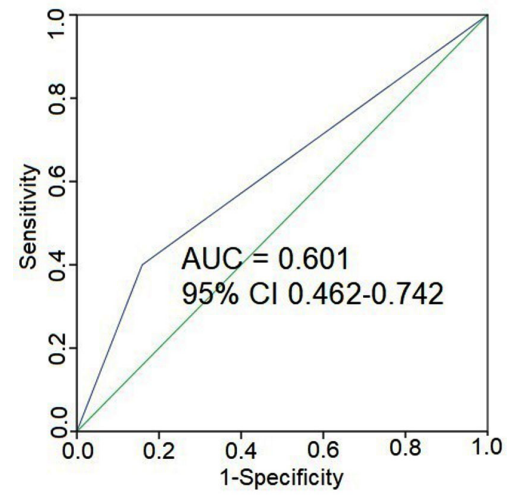

(b)

**Figure S6.** Receiver operating characteristic (ROC) curve of the diagnostic model (generated using 10 metabolites) for lung cancer prediction. **(a)** The ROC curve was generated using the results of Monte-Carlo cross validation (MetaboAnalyst 5.0). The following mean values were obtained: AUC – 0.69 (95% CI: 0.60-0.86); sensitivity – 0.78 (95% CI: 0.69-0.85); specificity – 0.75 (95% CI: 0.65-0.81). CI is shown in blue. **(b)** ROC curve of the diagnostic model obtained on the independent test set. The following values were obtained: AUC–0.60 (95% CI 0.46–0.74), sensitivity-0.61 (95% CI: 0.48-0.73), and specificity-0.69 (95% CI: 0.49-0.89). SPSS was used to build the plot.

**Table S1.** The accuracy results of orthogonal partial least squares discriminant analysis models.

| Compared groups                                      | R <sup>2</sup> Y | Q <sup>2</sup> | p-value |
|------------------------------------------------------|------------------|----------------|---------|
| control vs ccRCC patients<br>(III-IV stages)         | 0.73             | 0.69           | <0.01   |
| control vs ccRCC patients<br>(I-II stages)           | 0.61             | 0.52           | <0.05   |
| control vs pRCC and chrRCC patients<br>(I-II stages) | 0.56             | 0.50           | <0.05   |

R<sup>2</sup> – coefficient of determination; Q<sup>2</sup> – predictive ability; p-values – validity (evaluated through one hundred permutation validations; p-value ≤ 0.05 is considered as statistically significant).

**Table S2.** Putatively annotated differential metabolites.

| Name of metabolites                   | Formula                                                      | Adduct              | m/z     | Non-cancer<br>vs<br>ccRCC cancer<br>patients<br>(III-IV stages) |              | Non-cancer<br>vs<br>ccRCC<br>cancer patients<br>(I-II stages) |              | Non-cancer<br>vs<br>pRCC/chrRCC<br>cancer patients<br>(I-II stages) |              |
|---------------------------------------|--------------------------------------------------------------|---------------------|---------|-----------------------------------------------------------------|--------------|---------------------------------------------------------------|--------------|---------------------------------------------------------------------|--------------|
|                                       |                                                              |                     |         | P value                                                         | VIP<br>value | P value                                                       | VIP<br>value | P value                                                             | VIP<br>value |
| threonine                             | C <sub>4</sub> H <sub>9</sub> NO <sub>3</sub>                | [M+H] <sup>+</sup>  | 104.071 | 4.24 ×10 <sup>-3</sup>                                          | 0.95         | 1.95 ×10 <sup>-4</sup>                                        | 1.02         | 5.34 ×10 <sup>-3</sup>                                              | 1.01         |
| serine                                | C <sub>3</sub> H <sub>7</sub> NO <sub>3</sub>                | [M+H] <sup>+</sup>  | 106.049 | 6.02 ×10 <sup>-4</sup>                                          | 1.01         | 1.05 ×10 <sup>-4</sup>                                        | 0.99         | 9.36 ×10 <sup>-3</sup>                                              | 0.97         |
| proline                               | C <sub>5</sub> H <sub>9</sub> NO <sub>2</sub>                | [M+H] <sup>+</sup>  | 116.070 | 1.11 ×10 <sup>-4</sup>                                          | 1.02         | 1.95 ×10 <sup>-3</sup>                                        | 0.93         | 3.23 ×10 <sup>-3</sup>                                              | 0.94         |
| valine                                | C <sub>5</sub> H <sub>11</sub> NO <sub>2</sub>               | [M+H] <sup>+</sup>  | 118.086 | 5.38 ×10 <sup>-4</sup>                                          | 1.05         | 2.37 ×10 <sup>-4</sup>                                        | 1.03         | 4.74 ×10 <sup>-4</sup>                                              | 1.01         |
| delta(1)-piperidine-2-<br>carboxylate | C <sub>6</sub> H <sub>9</sub> NO <sub>2</sub>                | [M+H] <sup>+</sup>  | 128.070 | 2.12 ×10 <sup>-8</sup>                                          | 1.21         | 1.11 ×10 <sup>-4</sup>                                        | 1.02         | 3.93 ×10 <sup>-4</sup>                                              | 1.02         |
| oxoproline                            | C <sub>5</sub> H <sub>7</sub> NO <sub>3</sub>                | [M] <sup>+</sup>    | 129.042 | 9.24 ×10 <sup>-7</sup>                                          | 1.21         | 1.76 ×10 <sup>-4</sup>                                        | 0.97         | 6.71 ×10 <sup>-4</sup>                                              | 0.95         |
| oxoproline                            | C <sub>5</sub> H <sub>7</sub> NO <sub>3</sub>                | [M+H] <sup>+</sup>  | 130.049 | 4.87 ×10 <sup>-5</sup>                                          | 1.27         | 9.23 ×10 <sup>-4</sup>                                        | 0.99         | 8.23 ×10 <sup>-4</sup>                                              | 0.97         |
| pipecolinic acid                      | C <sub>6</sub> H <sub>11</sub> NO <sub>2</sub>               | [M+H] <sup>+</sup>  | 130.086 | 1.37 ×10 <sup>-10</sup>                                         | 1.07         | 3.11 ×10 <sup>-8</sup>                                        | 1.04         | 4.01 ×10 <sup>-7</sup>                                              | 1.02         |
| leucine                               | C <sub>6</sub> H <sub>13</sub> NO <sub>2</sub>               | [M+H] <sup>+</sup>  | 132.101 | 9.69 ×10 <sup>-3</sup>                                          | 1.16         | 1.42 ×10 <sup>-5</sup>                                        | 1.19         | 5.92 ×10 <sup>-4</sup>                                              | 1.11         |
| asparagine                            | C <sub>4</sub> H <sub>8</sub> N <sub>2</sub> O <sub>3</sub>  | [M+H] <sup>+</sup>  | 133.061 | 9.81 ×10 <sup>-10</sup>                                         | 1.04         | 7.93 ×10 <sup>-8</sup>                                        | 1.08         | 2.17 ×10 <sup>-7</sup>                                              | 1.07         |
| proline                               | C <sub>5</sub> H <sub>9</sub> NO <sub>2</sub>                | [M+Na] <sup>+</sup> | 138.052 | 9.87 ×10 <sup>-4</sup>                                          | 1.01         | 2.22 ×10 <sup>-3</sup>                                        | 0.86         | 6.31 ×10 <sup>-3</sup>                                              | 0.91         |
| valine                                | C <sub>5</sub> H <sub>11</sub> NO <sub>2</sub>               | [M+Na] <sup>+</sup> | 140.068 | 8.18 ×10 <sup>-3</sup>                                          | 1.08         | 2.61 ×10 <sup>-4</sup>                                        | 1.11         | 4.87 ×10 <sup>-3</sup>                                              | 1.08         |
| 3-dehydroxycarnitine                  | C <sub>7</sub> H <sub>15</sub> NO <sub>2</sub>               | [M+Na] <sup>+</sup> | 146.117 | 2.43 ×10 <sup>-6</sup>                                          | 1.23         | 1.31 ×10 <sup>-2</sup>                                        | 1.12         | 3.53 ×10 <sup>-2</sup>                                              | 1.11         |
| glutamine                             | C <sub>5</sub> H <sub>10</sub> N <sub>2</sub> O <sub>3</sub> | [M+H] <sup>+</sup>  | 147.076 | 1.22 ×10 <sup>-8</sup>                                          | 1.27         | 1.11 ×10 <sup>-9</sup>                                        | 1.16         | 4.21 ×10 <sup>-8</sup>                                              | 1.15         |
| lysine                                | C <sub>6</sub> H <sub>14</sub> N <sub>2</sub> O <sub>2</sub> | [M+H] <sup>+</sup>  | 147.112 | 9.05 ×10 <sup>-7</sup>                                          | 0.99         | 7.11 ×10 <sup>-10</sup>                                       | 1.02         | 7.83 ×10 <sup>-8</sup>                                              | 1.02         |

|                                  |                                                               |                     |         |                         |      |                         |      |                         |      |
|----------------------------------|---------------------------------------------------------------|---------------------|---------|-------------------------|------|-------------------------|------|-------------------------|------|
| taurine                          | C <sub>2</sub> H <sub>7</sub> NO <sub>3</sub> S               | [M+Na] <sup>+</sup> | 148.003 | 6.53 ×10 <sup>-7</sup>  | 1.16 | 4.18 ×10 <sup>-3</sup>  | 0.81 | 3.11 ×10 <sup>-3</sup>  | 0.86 |
| glutamate                        | C <sub>5</sub> H <sub>9</sub> NO <sub>4</sub>                 | [M+H] <sup>+</sup>  | 148.060 | 5.19 ×10 <sup>-10</sup> | 1.19 | 2.76 ×10 <sup>-9</sup>  | 1.15 | 6.85 ×10 <sup>-8</sup>  | 1.14 |
| methionine                       | C <sub>5</sub> H <sub>11</sub> NO <sub>2</sub> S              | [M+H] <sup>+</sup>  | 150.058 | 1.38 ×10 <sup>-9</sup>  | 1.13 | 2.76 ×10 <sup>-9</sup>  | 1.09 | 3.33 ×10 <sup>-7</sup>  | 1.07 |
| leucine                          | C <sub>6</sub> H <sub>13</sub> NO <sub>2</sub>                | [M+Na] <sup>+</sup> | 154.083 | 2.54 ×10 <sup>-4</sup>  | 1.29 | 6.69 ×10 <sup>-6</sup>  | 1.16 | 2.05 ×10 <sup>-6</sup>  | 1.14 |
| aspartate                        | C <sub>4</sub> H <sub>7</sub> NO <sub>4</sub>                 | [M+Na] <sup>+</sup> | 156.026 | 1.23 ×10 <sup>-3</sup>  | 1.06 | 2.83 ×10 <sup>-6</sup>  | 1.09 | 2.83 ×10 <sup>-5</sup>  | 1.08 |
| valine                           | C <sub>5</sub> H <sub>11</sub> NO <sub>2</sub>                | [M+K] <sup>+</sup>  | 156.042 | 1.23 ×10 <sup>-5</sup>  | 1.07 | 2.83 ×10 <sup>-4</sup>  | 1.07 | 3.07 ×10 <sup>-4</sup>  | 1.06 |
| histidine                        | C <sub>6</sub> H <sub>9</sub> N <sub>3</sub> O <sub>2</sub>   | [M+H] <sup>+</sup>  | 156.076 | 6.61 ×10 <sup>-5</sup>  | 1.01 | 6.77 ×10 <sup>-4</sup>  | 0.96 | 6.43 ×10 <sup>-4</sup>  | 0.99 |
| L-carnitine                      | C <sub>7</sub> H <sub>16</sub> NO <sub>3</sub>                | [M] <sup>+</sup>    | 162.112 | 1.20 ×10 <sup>-6</sup>  | 1.22 | 6.10 ×10 <sup>-5</sup>  | 1.17 | 7.13 ×10 <sup>-4</sup>  | 1.14 |
| phenylalanine                    | C <sub>9</sub> H <sub>11</sub> NO <sub>2</sub>                | [M+H] <sup>+</sup>  | 166.086 | 7.17 ×10 <sup>-5</sup>  | 1.05 | 4.20 ×10 <sup>-3</sup>  | 1.01 | 4.72 ×10 <sup>-3</sup>  | 1.01 |
| glutamine                        | C <sub>5</sub> H <sub>10</sub> N <sub>2</sub> O <sub>3</sub>  | [M+Na] <sup>+</sup> | 169.058 | 2.15 ×10 <sup>-7</sup>  | 1.31 | 1,24 ×10 <sup>-6</sup>  | 1.19 | 1.07 ×10 <sup>-6</sup>  | 1.22 |
| asparagine                       | C <sub>4</sub> H <sub>8</sub> N <sub>2</sub> O <sub>3</sub>   | [M+K] <sup>+</sup>  | 171.016 | 7.77 ×10 <sup>-3</sup>  | 1.01 | 2.93 ×10 <sup>-3</sup>  | 0.99 | 3.63 ×10 <sup>-3</sup>  | 0.98 |
| arginine                         | C <sub>6</sub> H <sub>14</sub> N <sub>4</sub> O <sub>2</sub>  | [M+H] <sup>+</sup>  | 175.118 | 2.49 ×10 <sup>-7</sup>  | 1.11 | 2.88 ×10 <sup>-9</sup>  | 1.18 | 5.96 ×10 <sup>-7</sup>  | 1.12 |
| citrulline                       | C <sub>6</sub> H <sub>13</sub> N <sub>3</sub> O <sub>3</sub>  | [M+H] <sup>+</sup>  | 176.102 | 2.63 ×10 <sup>-5</sup>  | 1.15 | 1.68 ×10 <sup>-6</sup>  | 1.17 | 9.22 ×10 <sup>-5</sup>  | 1.18 |
| tyrosine                         | C <sub>9</sub> H <sub>11</sub> NO <sub>3</sub>                | [M+H] <sup>+</sup>  | 182.081 | 1.82 ×10 <sup>-8</sup>  | 1.18 | 1.67 ×10 <sup>-2</sup>  | 1.02 | 7.45 ×10 <sup>-2</sup>  | 1.01 |
| 4-acetamidobutanoate             | C <sub>6</sub> H <sub>11</sub> NO <sub>3</sub>                | [M+K] <sup>+</sup>  | 184.037 | 5.63 ×10 <sup>-9</sup>  | 1.12 | 5.57 ×10 <sup>-4</sup>  | 1.01 | 1.04 ×10 <sup>-4</sup>  | 1.01 |
| glutamate                        | C <sub>5</sub> H <sub>9</sub> NO <sub>4</sub>                 | [M+K] <sup>+</sup>  | 184.984 | 3.10 ×10 <sup>-7</sup>  | 1.27 | 3.29 ×10 <sup>-6</sup>  | 1.09 | 5.06 ×10 <sup>-6</sup>  | 1.11 |
| glutamine                        | C <sub>5</sub> H <sub>10</sub> N <sub>2</sub> O <sub>3</sub>  | [M+K] <sup>+</sup>  | 185.032 | 1.37 ×10 <sup>-9</sup>  | 1.19 | 1.94 ×10 <sup>-8</sup>  | 1.16 | 3.92 ×10 <sup>-8</sup>  | 1.18 |
| hydroxyglutamate<br>semialdehyde | C <sub>5</sub> H <sub>9</sub> NO <sub>4</sub>                 | [M+K] <sup>+</sup>  | 186.016 | 5.32 ×10 <sup>-7</sup>  | 1.07 | 8.23 ×10 <sup>-4</sup>  | 1.01 | 3.72 ×10 <sup>-4</sup>  | 1.03 |
| phenylalanine                    | C <sub>9</sub> H <sub>11</sub> NO <sub>2</sub>                | [M+Na] <sup>+</sup> | 188.068 | 1,67 ×10 <sup>-7</sup>  | 1.11 | 3,96 ×10 <sup>-3</sup>  | 0.91 | 5,68 ×10 <sup>-3</sup>  | 0.88 |
| citrulline                       | C <sub>6</sub> H <sub>13</sub> N <sub>3</sub> O <sub>3</sub>  | [M+Na] <sup>+</sup> | 198.084 | 1.22 ×10 <sup>-5</sup>  | 1.08 | 5.53 ×10 <sup>-6</sup>  | 1.17 | 8.77 ×10 <sup>-5</sup>  | 1.14 |
| tryptophan                       | C <sub>11</sub> H <sub>12</sub> N <sub>2</sub> O <sub>2</sub> | [M+H] <sup>+</sup>  | 205.097 | 9.64 ×10 <sup>-12</sup> | 1.23 | 2.57 ×10 <sup>-15</sup> | 1.15 | 7.04 ×10 <sup>-12</sup> | 1.12 |
| citrulline                       | C <sub>6</sub> H <sub>13</sub> N <sub>3</sub> O <sub>3</sub>  | [M+K] <sup>+</sup>  | 214.051 | 1.96 ×10 <sup>-10</sup> | 1.21 | 1,61 ×10 <sup>-7</sup>  | 1.16 | 9.04 ×10 <sup>-6</sup>  | 1.13 |



|                       |                                                                |                     |         |                         |      |                         |      |                        |      |
|-----------------------|----------------------------------------------------------------|---------------------|---------|-------------------------|------|-------------------------|------|------------------------|------|
| citrate               | C <sub>6</sub> H <sub>8</sub> O <sub>7</sub>                   | [M+Na] <sup>+</sup> | 215.016 | 2.31 ×10 <sup>-7</sup>  | 0.97 | 3.43 ×10 <sup>-11</sup> | 1.22 | 5.42 ×10 <sup>-8</sup> | 1.09 |
| tryptophan            | C <sub>11</sub> H <sub>12</sub> N <sub>2</sub> O <sub>2</sub>  | [M+Na] <sup>+</sup> | 227.079 | 7.31 ×10 <sup>-6</sup>  | 1.26 | 6.44 ×10 <sup>-8</sup>  | 1.21 | 6.43 ×10 <sup>-7</sup> | 1.19 |
| acetyl -galactosamine | C <sub>8</sub> H <sub>15</sub> NO <sub>6</sub>                 | [M+Na] <sup>+</sup> | 244.078 | 2.51 ×10 <sup>-6</sup>  | 1.03 | 2.63 ×10 <sup>-8</sup>  | 1.06 | 1.14 ×10 <sup>-7</sup> | 1.08 |
| glucosamine phosphate | C <sub>6</sub> H <sub>14</sub> NO <sub>8</sub> P               | [M+H] <sup>+</sup>  | 260.052 | 4.86 ×10 <sup>-9</sup>  | 1.22 | 3.19 ×10 <sup>-6</sup>  | 1.16 | 7.04 ×10 <sup>-5</sup> | 1.14 |
| C16-sphinganine       | C <sub>16</sub> H <sub>35</sub> NO <sub>2</sub>                | [M+H] <sup>+</sup>  | 274.274 | 8.88 ×10 <sup>-3</sup>  | 1.01 | 1.16 ×10 <sup>-3</sup>  | 1.01 | 1.01 ×10 <sup>-3</sup> | 1.01 |
| palmitic acid         | C <sub>16</sub> H <sub>32</sub> O <sub>2</sub>                 | [M+Na] <sup>+</sup> | 279.229 | 1.47 ×10 <sup>-4</sup>  | 1.21 | 1.49 ×10 <sup>-5</sup>  | 1.24 | 7.82 ×10 <sup>-4</sup> | 1.15 |
| C17 sphinganine       | C <sub>17</sub> H <sub>37</sub> NO <sub>2</sub>                | [M+H] <sup>+</sup>  | 288.289 | 1.63 ×10 <sup>-3</sup>  | 1.01 | 1.09 ×10 <sup>-3</sup>  | 1.01 | 6.85 ×10 <sup>-3</sup> | 1.01 |
| gamma-glutamyltaurine | C <sub>7</sub> H <sub>14</sub> N <sub>2</sub> O <sub>6</sub> S | [M+K] <sup>+</sup>  | 293.020 | 2.33 ×10 <sup>-5</sup>  | 1.09 | 1.64 ×10 <sup>-2</sup>  | 0.89 | 2.54 ×10 <sup>-2</sup> | 0.86 |
| linoleic acid         | C <sub>18</sub> H <sub>32</sub> O <sub>2</sub>                 | [M+Na] <sup>+</sup> | 303.229 | 9.53 ×10 <sup>-7</sup>  | 1.05 | 3.59 ×10 <sup>-6</sup>  | 1.03 | 7.26 ×10 <sup>-6</sup> | 1.02 |
| oleic acid            | C <sub>18</sub> H <sub>34</sub> O <sub>2</sub>                 | [M+Na] <sup>+</sup> | 305.245 | 8.39 ×10 <sup>-4</sup>  | 1.01 | 6.40 ×10 <sup>-4</sup>  | 1.01 | 9.12 ×10 <sup>-3</sup> | 1.01 |
| stearic acid          | C <sub>18</sub> H <sub>36</sub> O <sub>2</sub>                 | [M+Na] <sup>+</sup> | 307.261 | 1.88 ×10 <sup>-9</sup>  | 1.12 | 2.21 ×10 <sup>-8</sup>  | 1.11 | 8.45 ×10 <sup>-7</sup> | 1.08 |
| LysoPC(p16:0)         | C <sub>24</sub> H <sub>50</sub> NO <sub>6</sub> P              | [M+H] <sup>+</sup>  | 480.344 | 5.79 ×10 <sup>-4</sup>  | 1.03 | 2.73 ×10 <sup>-4</sup>  | 1.01 | 2.72 ×10 <sup>-3</sup> | 1.01 |
| LysoPC(16:0)          | C <sub>24</sub> H <sub>50</sub> NO <sub>7</sub> P              | [M+H] <sup>+</sup>  | 496.339 | 5.65 ×10 <sup>-3</sup>  | 1.04 | 3.71 ×10 <sup>-3</sup>  | 1.03 | 7.34 ×10 <sup>-3</sup> | 1.04 |
| LysoPC(18:3)          | C <sub>26</sub> H <sub>48</sub> NO <sub>7</sub> P              | [M+H] <sup>+</sup>  | 518.324 | 3.59 ×10 <sup>-3</sup>  | 1.18 | 2.44 ×10 <sup>-3</sup>  | 1.15 | 3.44 ×10 <sup>-3</sup> | 1.16 |
| LysoPC(18:2)          | C <sub>26</sub> H <sub>50</sub> NO <sub>7</sub> P              | [M+H] <sup>+</sup>  | 520.339 | 2.70 ×10 <sup>-9</sup>  | 1.03 | 1.29 ×10 <sup>-7</sup>  | 1.01 | 4.75 ×10 <sup>-7</sup> | 1.01 |
| LysoPC(18:1)          | C <sub>26</sub> H <sub>52</sub> NO <sub>7</sub> P              | [M+H] <sup>+</sup>  | 522.355 | 3.64 ×10 <sup>-3</sup>  | 1.01 | 1.01 ×10 <sup>-4</sup>  | 1.01 | 5.67 ×10 <sup>-3</sup> | 1.01 |
| LysoPC(18:0)          | C <sub>26</sub> H <sub>54</sub> NO <sub>7</sub> P              | [M+H] <sup>+</sup>  | 524.371 | 1.29 ×10 <sup>-3</sup>  | 1.01 | 1.75 ×10 <sup>-3</sup>  | 1.01 | 6.82 ×10 <sup>-4</sup> | 1.01 |
| LysoPC(20:5)          | C <sub>28</sub> H <sub>48</sub> NO <sub>7</sub> P              | [M+H] <sup>+</sup>  | 542.324 | 3.98 ×10 <sup>-12</sup> | 1.03 | 1.12 ×10 <sup>-8</sup>  | 1.02 | 3.98 ×10 <sup>-6</sup> | 1.01 |
| PC(32:2)              | C <sub>40</sub> H <sub>76</sub> NO <sub>8</sub> P              | [M+H] <sup>+</sup>  | 730.538 | 6.69 ×10 <sup>-13</sup> | 1.02 | 8.34 ×10 <sup>-9</sup>  | 1.01 | 2.65 ×10 <sup>-7</sup> | 1.01 |
| PC(32:1)              | C <sub>40</sub> H <sub>78</sub> NO <sub>8</sub> P              | [M+H] <sup>+</sup>  | 732.553 | 8.38 ×10 <sup>-8</sup>  | 1.03 | 7.71 ×10 <sup>-4</sup>  | 1.02 | 6.12 ×10 <sup>-7</sup> | 1.05 |
| PC(34:3)              | C <sub>42</sub> H <sub>78</sub> NO <sub>8</sub> P              | [M+H] <sup>+</sup>  | 756.553 | 2.74 ×10 <sup>-10</sup> | 1.06 | 3.20 ×10 <sup>-7</sup>  | 1.06 | 7.22 ×10 <sup>-6</sup> | 1.05 |
| PC(34:2)              | C <sub>42</sub> H <sub>80</sub> NO <sub>8</sub> P              | [M+H] <sup>+</sup>  | 758.569 | 1.55 ×10 <sup>-10</sup> | 1.04 | 5.69 ×10 <sup>-7</sup>  | 1.01 | 8.02 ×10 <sup>-6</sup> | 1.01 |

|          |                                                   |                    |         |                         |      |                        |      |                        |      |
|----------|---------------------------------------------------|--------------------|---------|-------------------------|------|------------------------|------|------------------------|------|
| PC(34:1) | C <sub>42</sub> H <sub>82</sub> NO <sub>8</sub> P | [M+H] <sup>+</sup> | 760.585 | 1.71 ×10 <sup>-7</sup>  | 1.02 | 5.20 ×10 <sup>-5</sup> | 1.01 | 7.32 ×10 <sup>-6</sup> | 1.01 |
| PC(36:5) | C <sub>44</sub> H <sub>78</sub> NO <sub>8</sub> P | [M+H] <sup>+</sup> | 780.553 | 2.37 ×10 <sup>-12</sup> | 1.12 | 9.58 ×10 <sup>-8</sup> | 1.09 | 6.69 ×10 <sup>-7</sup> | 1.08 |
| PC(36:3) | C <sub>44</sub> H <sub>82</sub> NO <sub>8</sub> P | [M+H] <sup>+</sup> | 784.585 | 9.03 ×10 <sup>-6</sup>  | 1.05 | 2.60 ×10 <sup>-7</sup> | 1.06 | 7.04 ×10 <sup>-6</sup> | 1.04 |
| PC(36:2) | C <sub>44</sub> H <sub>84</sub> NO <sub>8</sub> P | [M+H] <sup>+</sup> | 786.601 | 1.77 ×10 <sup>-11</sup> | 1.02 | 2.55 ×10 <sup>-8</sup> | 1.01 | 7.74 ×10 <sup>-7</sup> | 1.01 |
| PC(36:1) | C <sub>44</sub> H <sub>86</sub> NO <sub>8</sub> P | [M+H] <sup>+</sup> | 788.616 | 2.21 ×10 <sup>-9</sup>  | 1.05 | 1.85 ×10 <sup>-5</sup> | 1.01 | 8.05 ×10 <sup>-8</sup> | 1.04 |
| PC(38:7) | C <sub>46</sub> H <sub>78</sub> NO <sub>8</sub> P | [M+H] <sup>+</sup> | 804.553 | 1.22 ×10 <sup>-6</sup>  | 1.11 | 3.61 ×10 <sup>-7</sup> | 1.12 | 4.92 ×10 <sup>-6</sup> | 1.11 |
| PC(38:6) | C <sub>46</sub> H <sub>80</sub> NO <sub>8</sub> P | [M+H] <sup>+</sup> | 806.569 | 1.22 ×10 <sup>-9</sup>  | 1.14 | 9.43 ×10 <sup>-8</sup> | 1.18 | 4.25 ×10 <sup>-7</sup> | 1.12 |
| PC(42:3) | C <sub>50</sub> H <sub>94</sub> NO <sub>8</sub> P | [M+H] <sup>+</sup> | 868.678 | 7.22 ×10 <sup>-7</sup>  | 1.15 | 4.60 ×10 <sup>-7</sup> | 1.17 | 5.65 ×10 <sup>-6</sup> | 1.14 |
| PC(42:1) | C <sub>50</sub> H <sub>98</sub> NO <sub>8</sub> P | [M+H] <sup>+</sup> | 872.710 | 9.95 ×10 <sup>-6</sup>  | 1.13 | 9.70 ×10 <sup>-7</sup> | 1.15 | 7.23 ×10 <sup>-6</sup> | 1.14 |

p-value – obtained from pairwise Mann–Whitney *U* test; VIP value – obtained from OPLS-DA

**Table S3.** Identification of differential metabolites by MS/MS fragmentation.

| Precursor Ion |                               |                               |                                                               |                      | Product Ion                   |                              |                                                 |                      |
|---------------|-------------------------------|-------------------------------|---------------------------------------------------------------|----------------------|-------------------------------|------------------------------|-------------------------------------------------|----------------------|
| Metabolite    | Registered<br><i>m/z</i> , Da | Calculated<br><i>m/z</i> , Da | Chemical<br>Formula                                           | Ion<br>Type          | Registered<br><i>m/z</i> , Da | Reference<br><i>m/z</i> , Da | Chemical<br>Formula                             | Ion<br>Type          |
| proline       | 116.0701                      | 116.0706                      | C <sub>5</sub> H <sub>9</sub> NO <sub>2</sub>                 | [M + H] <sup>+</sup> | 98.0607                       | 98.0600                      | C <sub>5</sub> H <sub>8</sub> NO                | [M] <sup>+</sup>     |
| valine        | 118.0861                      | 118.0862                      | C <sub>5</sub> H <sub>11</sub> NO <sub>2</sub>                | [M + H] <sup>+</sup> | 102.0549                      | 102.0555                     | C <sub>4</sub> H <sub>8</sub> NO <sub>2</sub>   | [M] <sup>+</sup>     |
| 4-oxoproline  | 130.0497                      | 130.0487                      | C <sub>5</sub> H <sub>7</sub> NO <sub>3</sub>                 | [M + H] <sup>+</sup> | 84.0444                       | 84.0444                      | unknown                                         | unknown              |
| leucine       | 132,1024                      | 132.1019                      | C <sub>6</sub> H <sub>13</sub> NO <sub>2</sub>                | [M + H] <sup>+</sup> | 86.097                        | 86.0969                      | C <sub>5</sub> H <sub>12</sub> N                | [M] <sup>+</sup>     |
| glutamine     | 147.0776                      | 147.0764                      | C <sub>5</sub> H <sub>10</sub> N <sub>2</sub> O <sub>3</sub>  | [M + H] <sup>+</sup> | 130.0496                      | 130.056                      | C <sub>5</sub> H <sub>7</sub> NO <sub>3</sub>   | [M + H] <sup>+</sup> |
|               |                               |                               |                                                               |                      | 101.0706                      | 101.07                       | unknown                                         | unknown              |
| lysine        | 147.1126                      | 147.1128                      | C <sub>6</sub> H <sub>14</sub> N <sub>2</sub> O <sub>2</sub>  | [M + H] <sup>+</sup> | 130.0860                      | 130.0887                     | unknown                                         | unknown              |
|               |                               |                               |                                                               |                      | 129.1024                      | 129.1022                     | C <sub>6</sub> H <sub>13</sub> N <sub>2</sub> O | [M] <sup>+</sup>     |
| glutamate     | 148.0603                      | 148.0607                      | C <sub>5</sub> H <sub>9</sub> NO <sub>4</sub>                 | [M + H] <sup>+</sup> | 130.0496                      | 130.056                      | C <sub>5</sub> H <sub>7</sub> NO <sub>3</sub>   | [M + H] <sup>+</sup> |
|               |                               |                               |                                                               |                      | 102.0550                      | 102.056                      | C <sub>4</sub> H <sub>8</sub> NO <sub>2</sub>   | [M] <sup>+</sup>     |
|               |                               |                               |                                                               |                      | 84.0454                       | 84.045                       | C <sub>4</sub> H <sub>6</sub> NO                | [M] <sup>+</sup>     |
| methionine    | 150.0585                      | 150.0583                      | C <sub>5</sub> H <sub>11</sub> NO <sub>2</sub> S              | [M + H] <sup>+</sup> | 104.0536                      | 104.0529                     | unknown                                         | unknown              |
| carnitine     | 162.1126                      | 162.1125                      | C <sub>7</sub> H <sub>15</sub> NO <sub>3</sub>                | [M + H] <sup>+</sup> | 103.0390                      | 103.039                      | C <sub>4</sub> H <sub>7</sub> O <sub>3</sub>    | [M] <sup>+</sup>     |
|               |                               |                               |                                                               |                      | 102.0913                      | 102.0913                     | C <sub>5</sub> H <sub>12</sub> NO               | [M] <sup>+</sup>     |
|               |                               |                               |                                                               |                      | 85.0289                       | 85.0284                      | C <sub>4</sub> H <sub>4</sub> O <sub>2</sub>    | [M + H] <sup>+</sup> |
| phenylalanine | 166.0859                      | 166.0862                      | C <sub>9</sub> H <sub>11</sub> NO <sub>2</sub>                | [M + H] <sup>+</sup> | 147.0304                      | 147.0                        | unknown                                         | unknown              |
|               |                               |                               |                                                               |                      | 131.9872                      | 131.2                        | unknown                                         | unknown              |
|               |                               |                               |                                                               |                      | 120.0806                      | 120.1                        | unknown                                         | unknown              |
|               |                               |                               |                                                               |                      | 102.9499                      | 102.9                        | unknown                                         | unknown              |
| arginine      | 175.1242                      | 175.1196                      | C <sub>6</sub> H <sub>14</sub> N <sub>4</sub> O <sub>2</sub>  | [M + H] <sup>+</sup> | 129.9713                      | 129.98                       | unknown                                         | unknown              |
|               |                               |                               |                                                               |                      | 115.9619                      | 115.96                       | unknown                                         | unknown              |
| tryptophan    | 205.0926                      | 205.0971                      | C <sub>11</sub> H <sub>12</sub> N <sub>2</sub> O <sub>2</sub> | [M + H] <sup>+</sup> | 170.0618                      | 170.0606                     | C <sub>11</sub> H <sub>8</sub> NO               | [M] <sup>+</sup>     |
|               |                               |                               |                                                               |                      | 144.0822                      | 144.0813                     | C <sub>10</sub> H <sub>10</sub> N               | [M] <sup>+</sup>     |
|               |                               |                               |                                                               |                      | 118.0650                      | 118.0657                     | C <sub>8</sub> H <sub>8</sub> N                 | [M] <sup>+</sup>     |

Identification was carried out by matching fragmentation spectra (result of MS/MS fragmentation of differential metabolites) to reference fragmentation spectra of metabolites from the public metabolite databases (HMDB, METLIN); *m/z* — mass-to-charge ratio. A mass tolerance window — 0.005 Da.

**Table S4.** A discrimination ability of the model for prediction of early stage ccRCC.

| Testing group<br>Patients with early stage ccRCC | AUC  | Confidence<br>interval | Sensitivity | Specificity | Accuracy |
|--------------------------------------------------|------|------------------------|-------------|-------------|----------|
| Male                                             | 0.94 | 0.850-0.992            | 0.89        | 0.90        | 0.89     |
| Female                                           | 0.95 | 0.890-0.989            | 0.86        | 0.97        | 0.91     |

ROC curves of the models were generated using the results of Monte-Carlo cross validation (MetaboAnalyst 5.0) (100-times repeated 3-fold).
